# Supplementary material for: Circulating neutrophils from patients with early breast cancer have distinct subtype-dependent phenotypes
Source: Springer Nature journal article supplement (doi:10.1186/s13058-023-01707-3), 2023-10-19
Supplement: MOESM8 [file 26202234]

## Supplementary Figure 5

### Principle Component Analysis in different subtypes compared to match HV.

#### a-d. Serine Threonine kinase (STK)

a

HR-positive HER2 negative pts Vs HVs

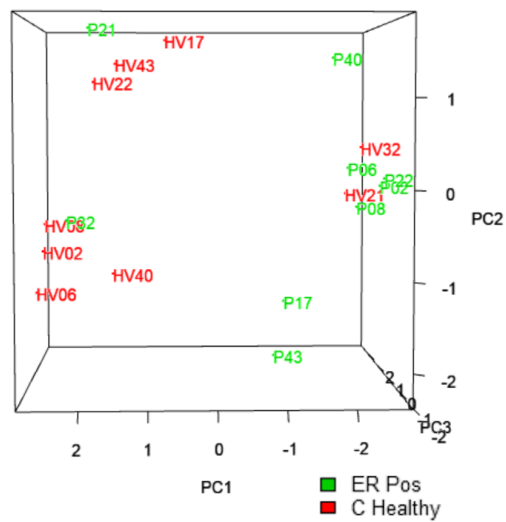

b

HR-positive HER2 positive pts Vs HVs

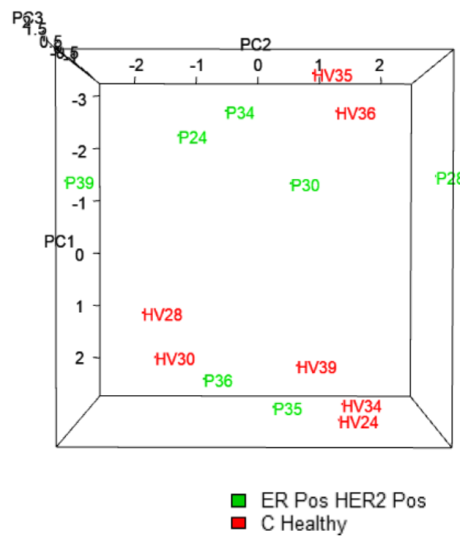

c

Triple negative pts Vs HVs

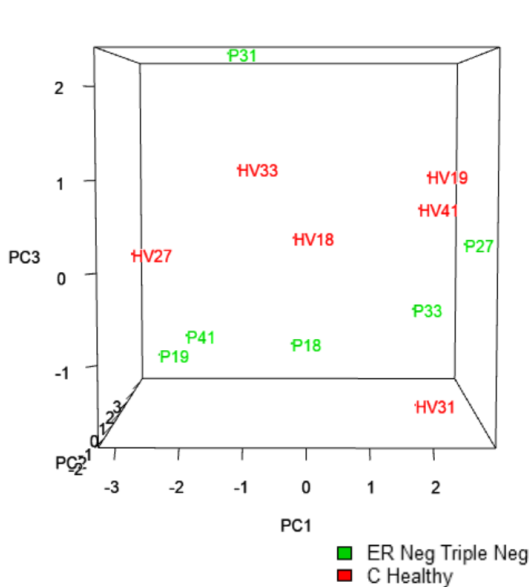

d

HR-negative HER2 positive pts Vs HVs

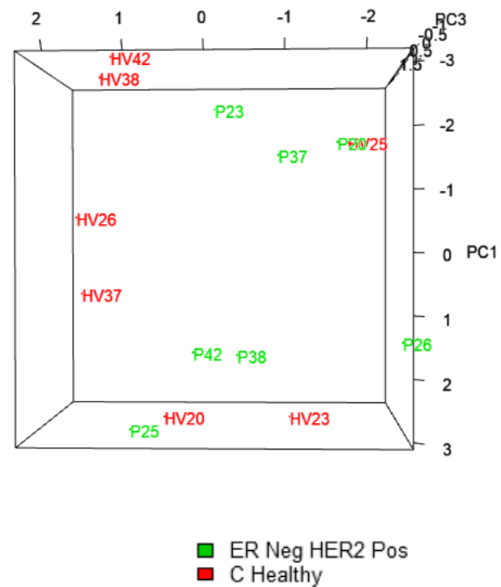

### e-h. Phosphotyrosine kinase (PTK)

**e**  
HR-positive HER2 negative patients Vs HVs

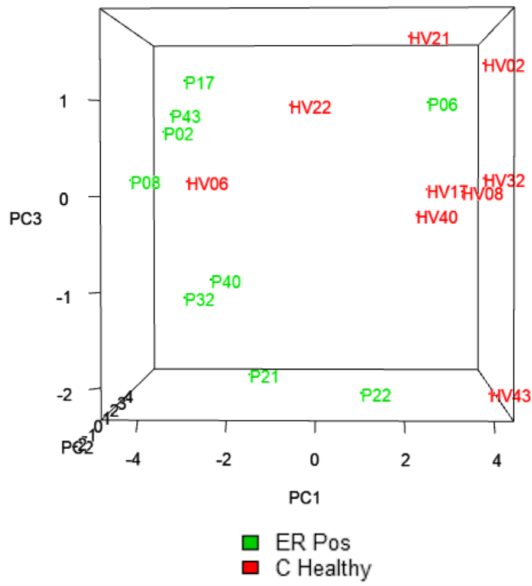

**f**  
HR-positive HER2 positive patients Vs HVs

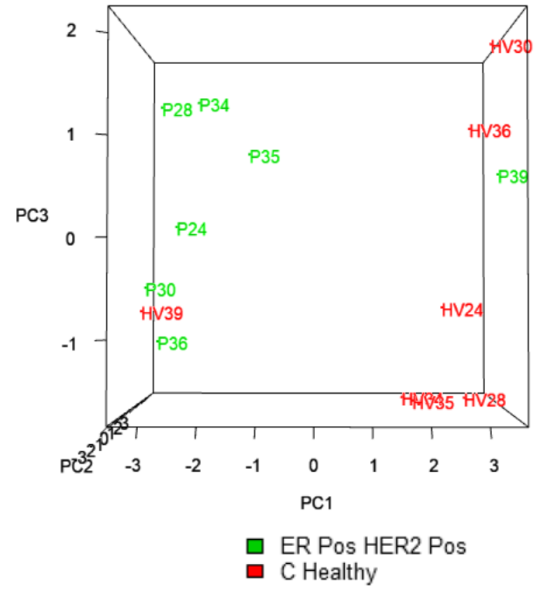

**g**  
Triple negative patients Vs HVs

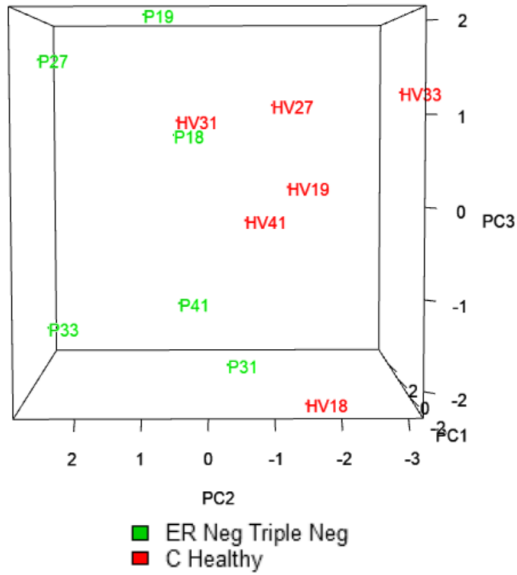

**h**  
HR-negative HER2 positive patients Vs HVs

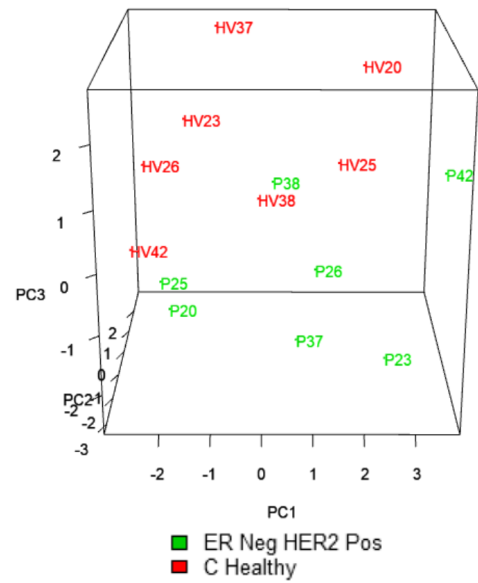

**Principle Component Analysis in different subtypes compared to match HV.**

**a-d: Principal Component Analysis (PCA) of the different subtypes of breast cancer compared to HVs for the STK family of kinases.**

a. HR-positive HER2 negative breast cancer (represented by ER pos) and HVs (represented by C Healthy); b: patients with HR-positive HER2 positive breast cancer (represented by ER pos HER2 pos) and HVs (represented by C Healthy); c: patients with HR-negative HER2 positive breast cancer (represented by ER neg HER2 pos) and HVs (represented by C Healthy); d: patients with Triple negative breast cancer (represented by Triple neg) and HVs (represented by C Healthy).

**e-h Principal Component Analysis (PCA) of the different subtypes of breast cancer compared to HVs for the PTK family of kinases.**

e: patients with HR-positive HER2 negative breast cancer (represented by ER pos) and HVs (represented by C Healthy); f: patients with HR-positive HER2 positive breast cancer (represented by ER pos HER2 pos) and HVs (represented by C Healthy); g: patients with HR-negative HER2 positive breast cancer (represented by ER neg HER2 pos) and HVs (represented by C Healthy); h: patients with Triple negative breast cancer (represented by Triple neg) and HVs (represented by C Healthy).
