# Supplementary material for: Circulating neutrophils from patients with early breast cancer have distinct subtype-dependent phenotypes
Source: Springer Nature journal article supplement (doi:10.1186/s13058-023-01707-3), 2023-10-19
Supplement: MOESM12 [file 26202234]

## Supplementary Figure 7

Upstream Kinase Analysis (UKA) generated list of putative kinases based on peptides targeted for phosphorylation in patients with different breast cancer subtypes.

### Serine Threonine kinase (STK)

HR-pos HER2 neg pts Vs HVs

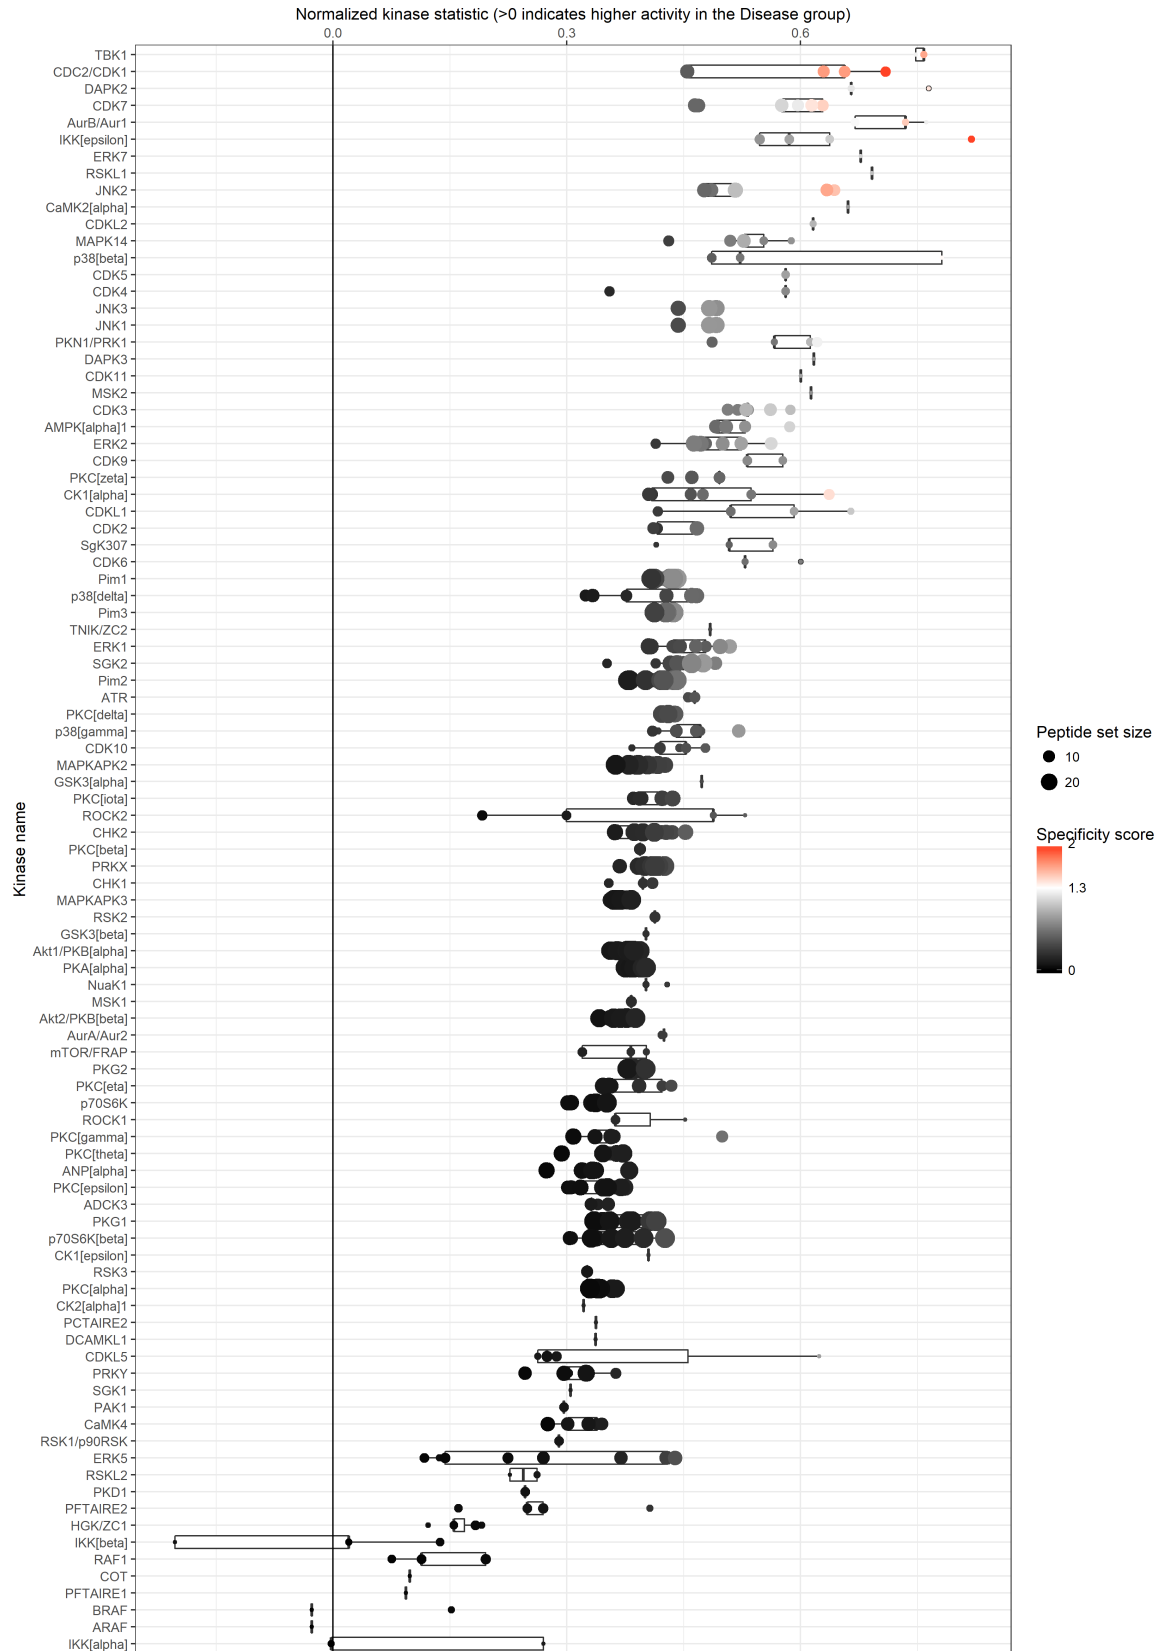

# HR-pos HER2 pos pts Vs HVs

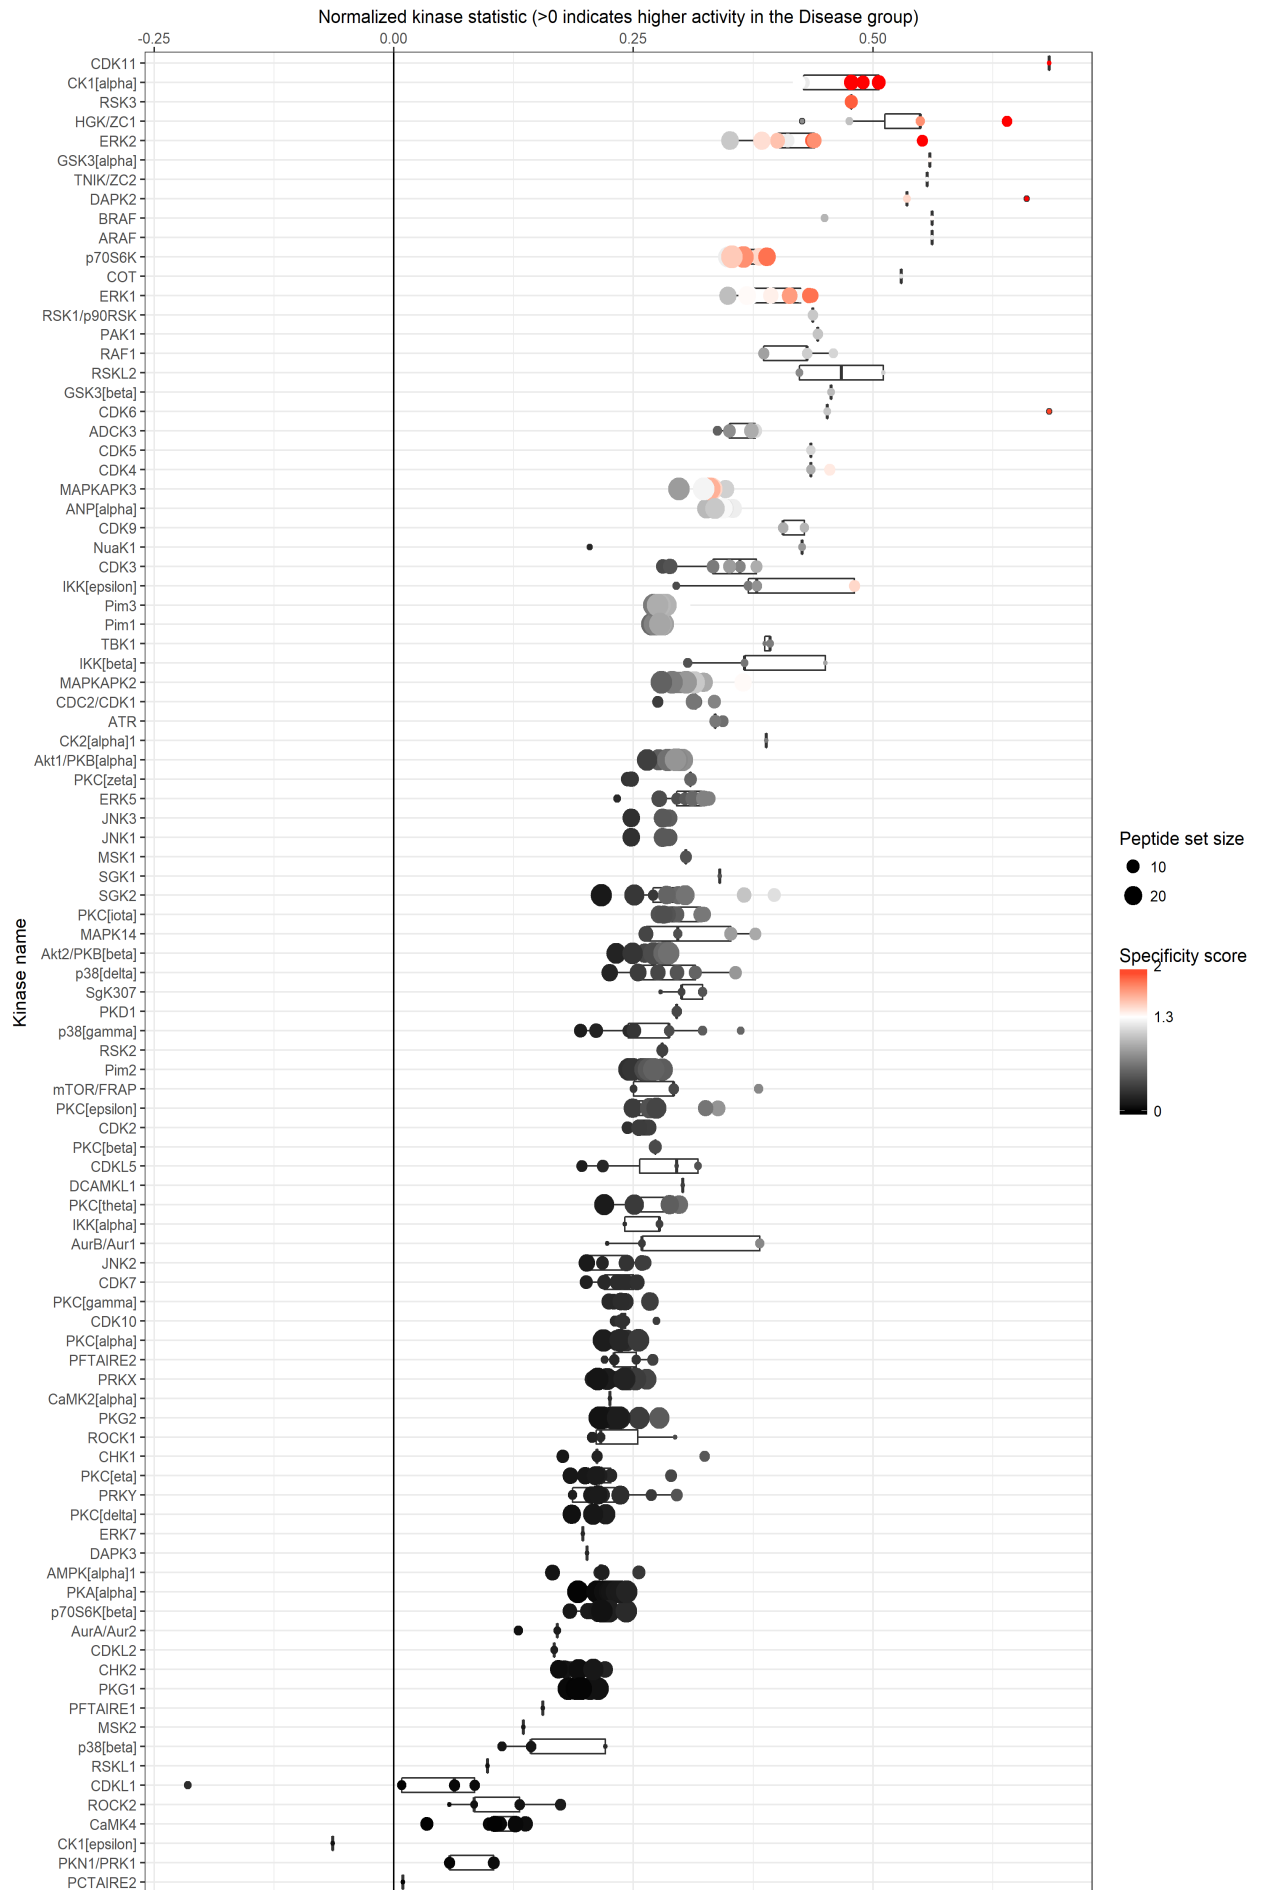

# Triple negative pts Vs HVs

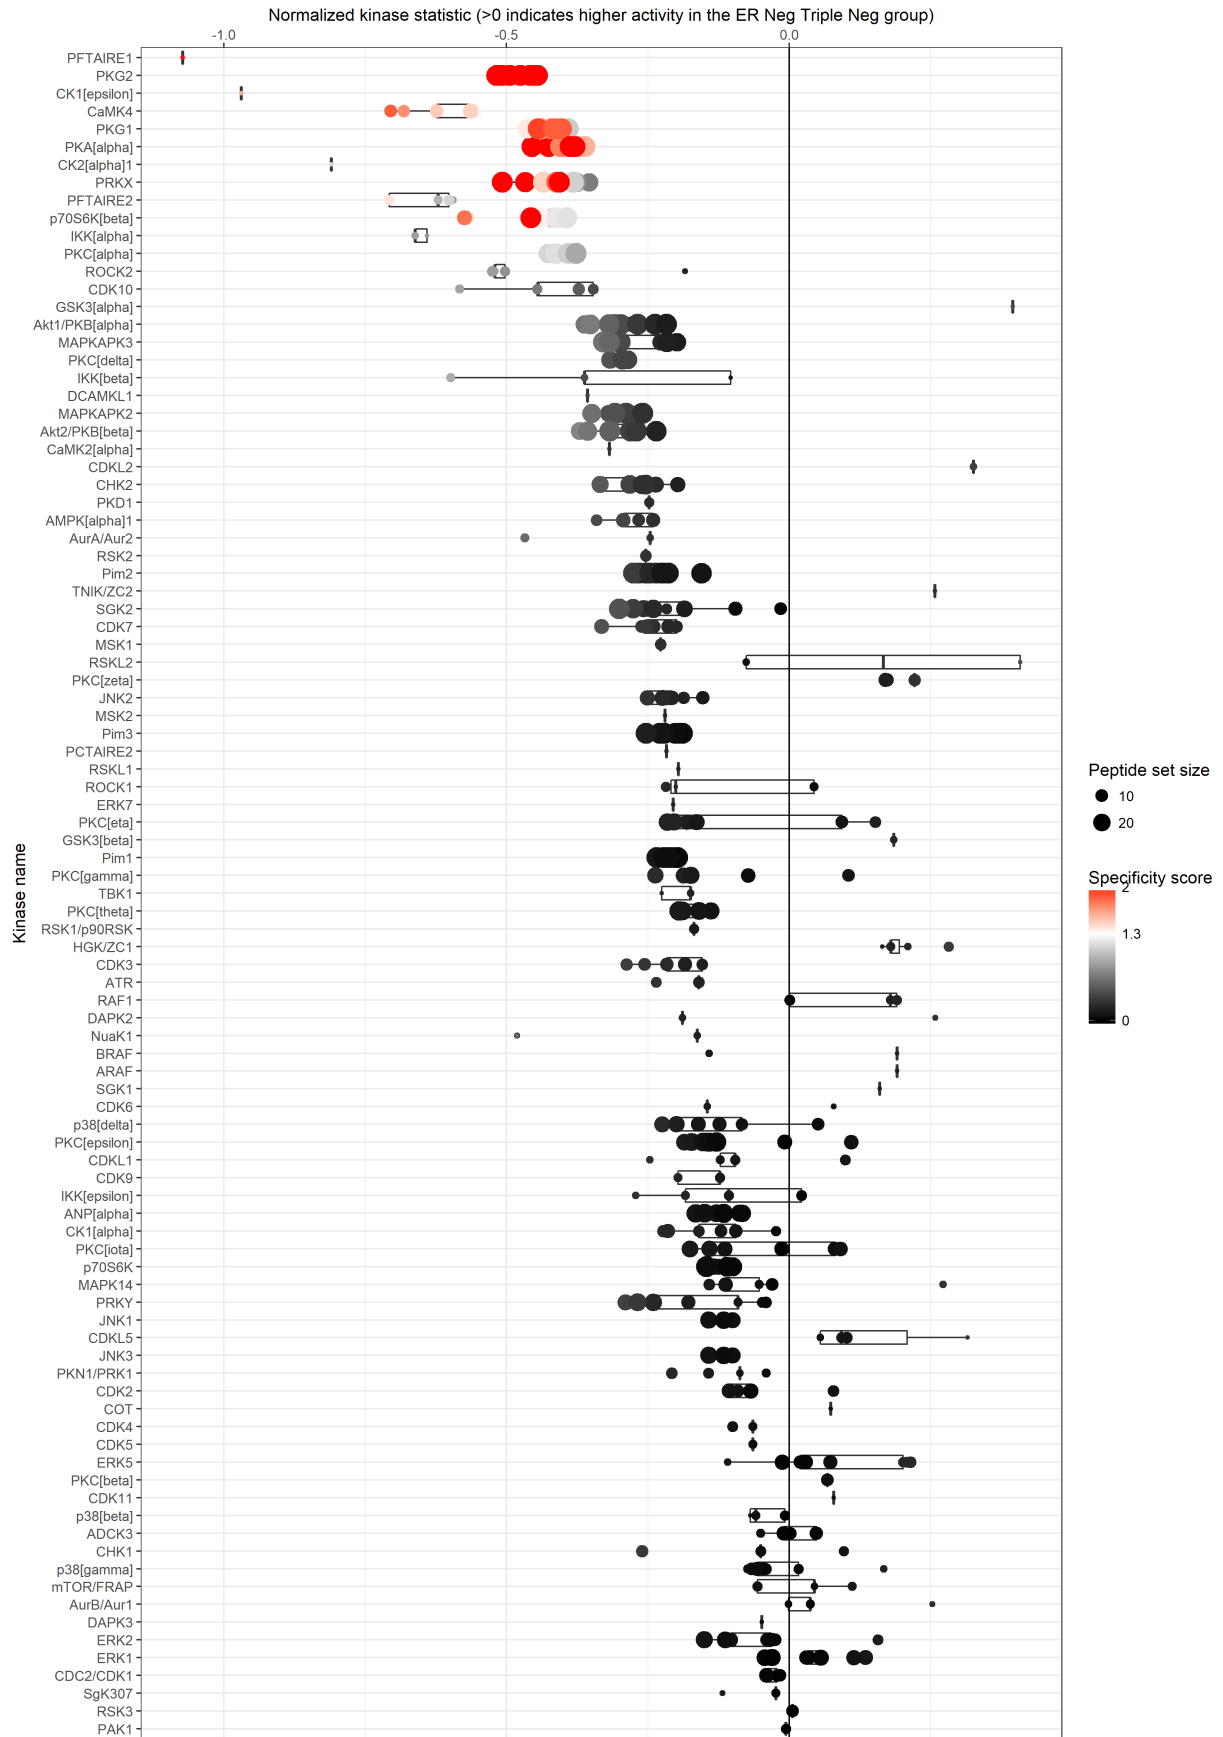

# HR-neg HER2 pos pts Vs HVs

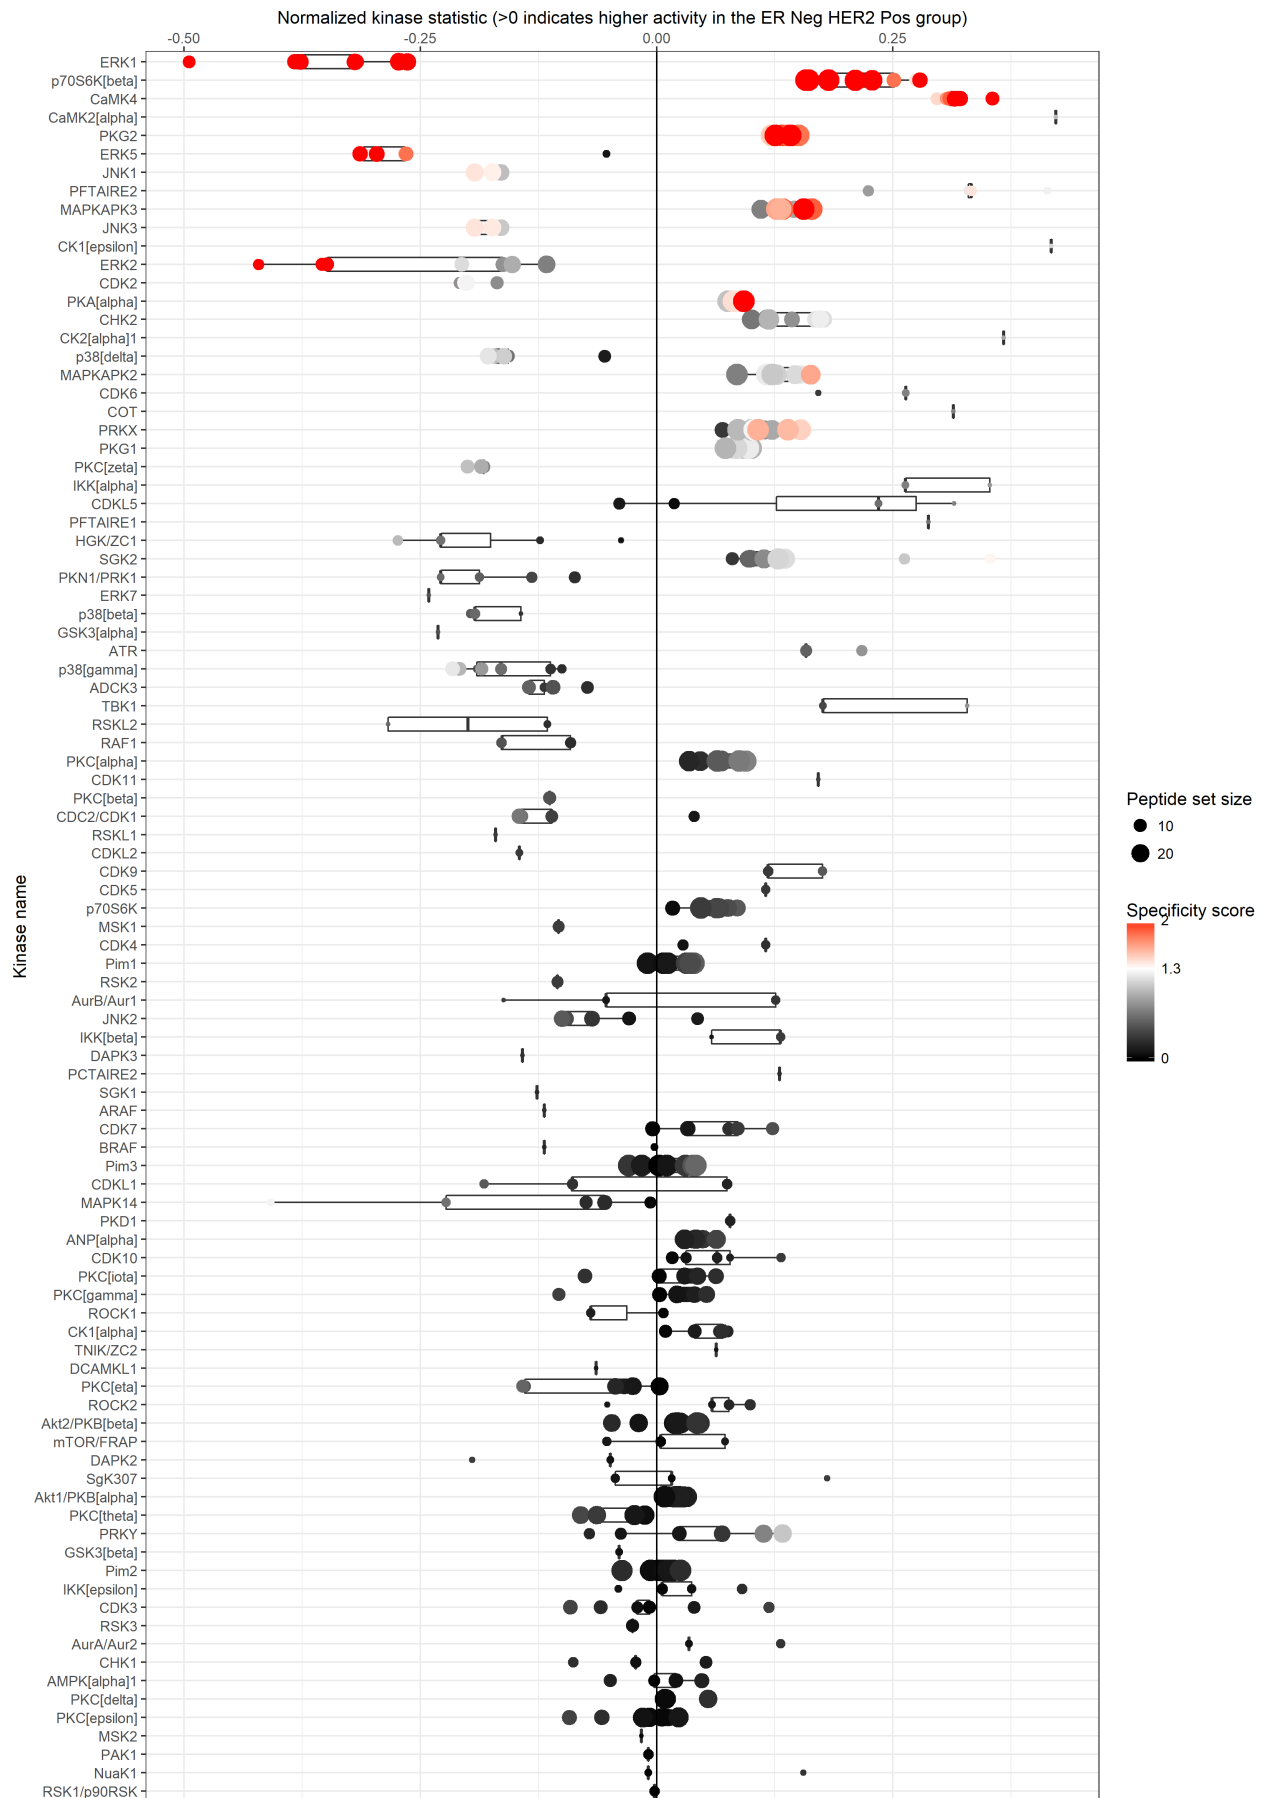

# Phosphotyrosine kinase (PTK)

HR-pos HER2 neg pts Vs HVs

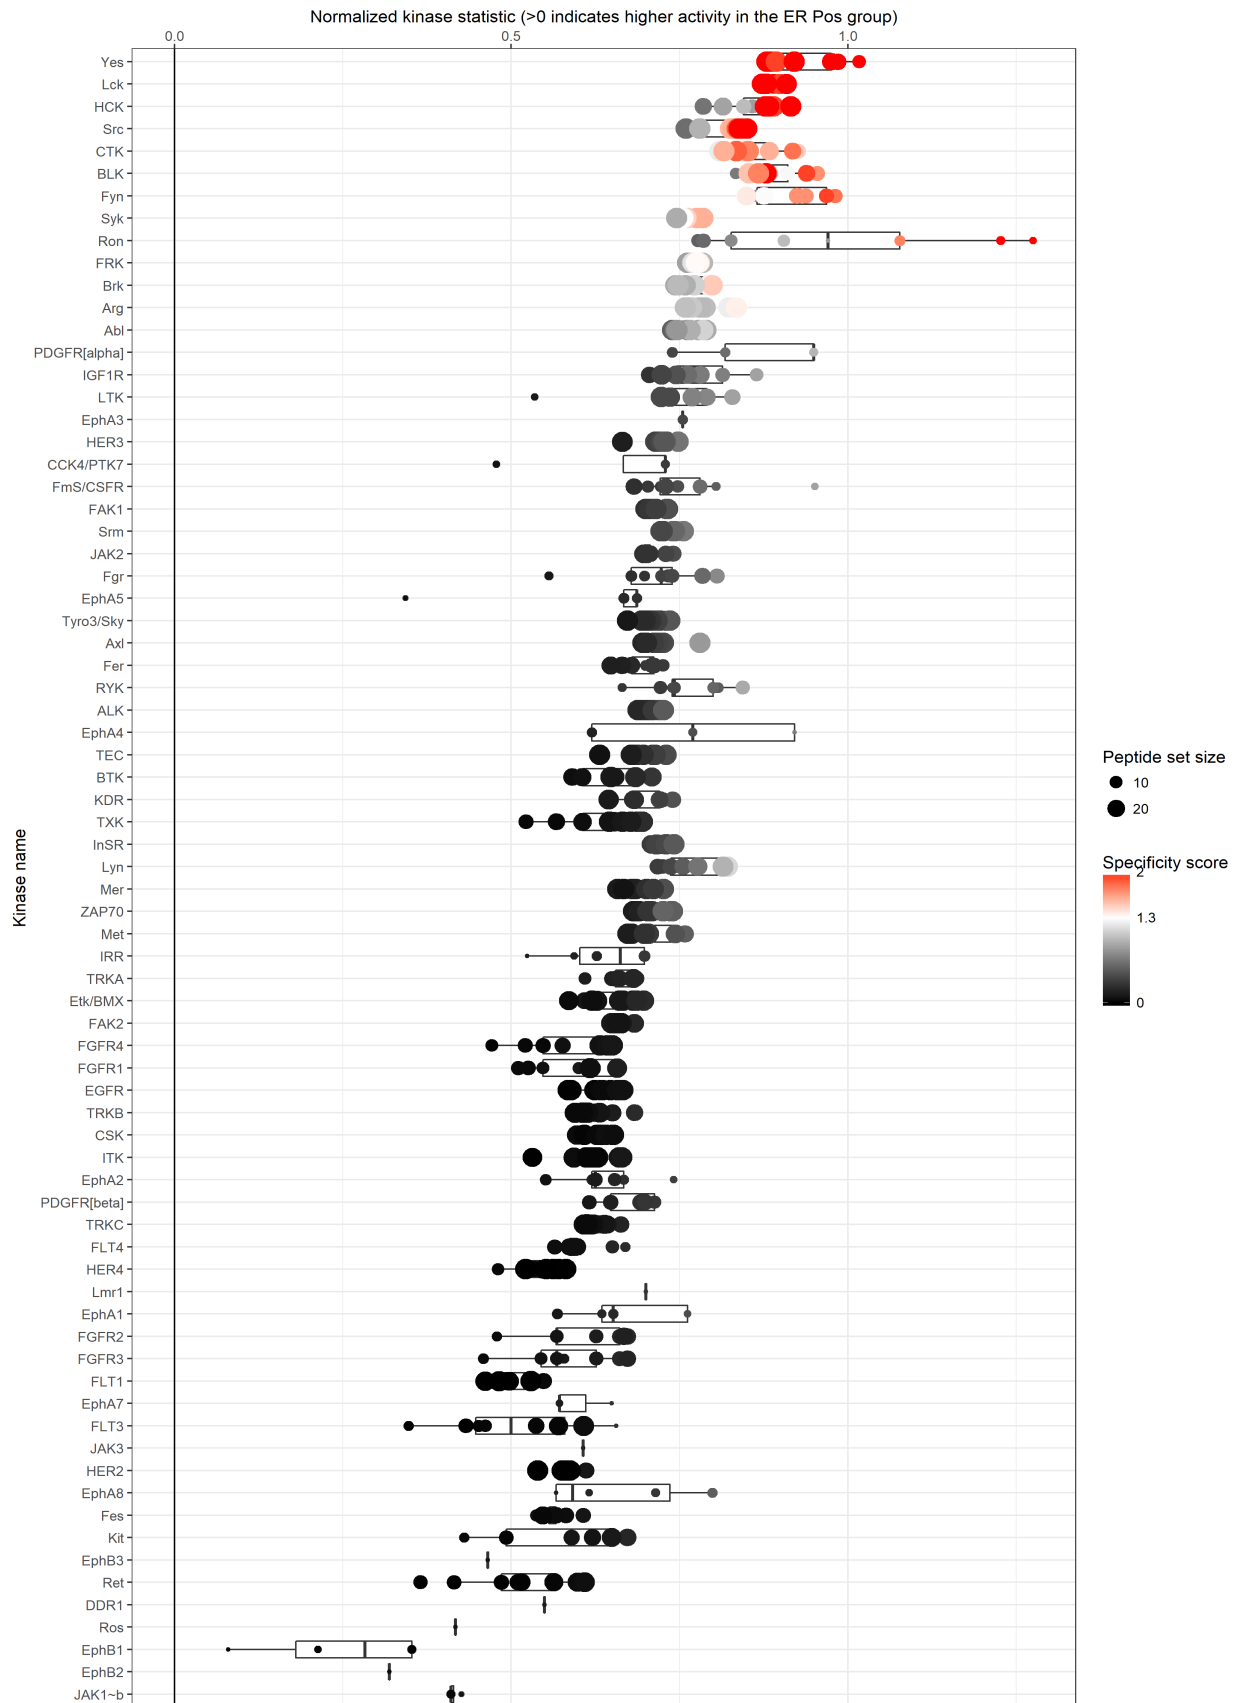

# HR-pos HER2 pos pts Vs HVs

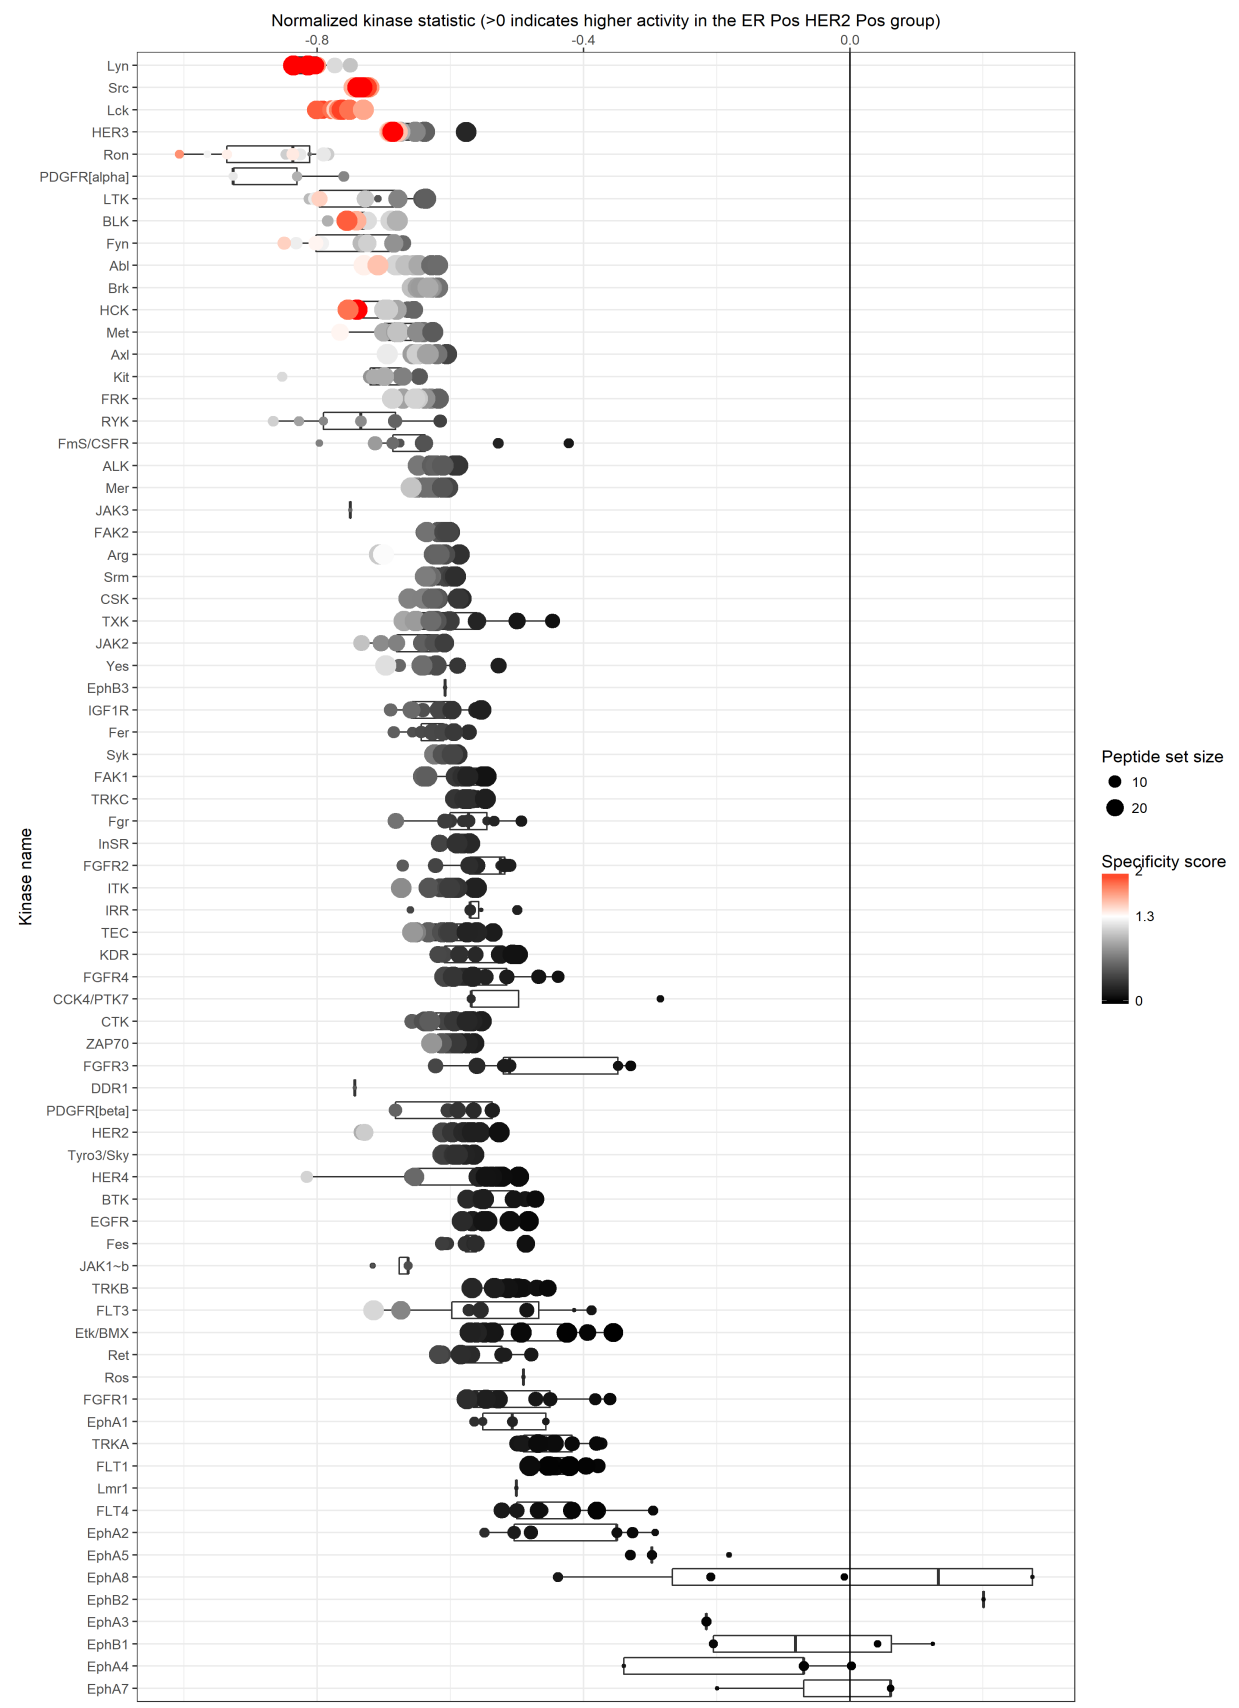

# Triple negative pts Vs HVs

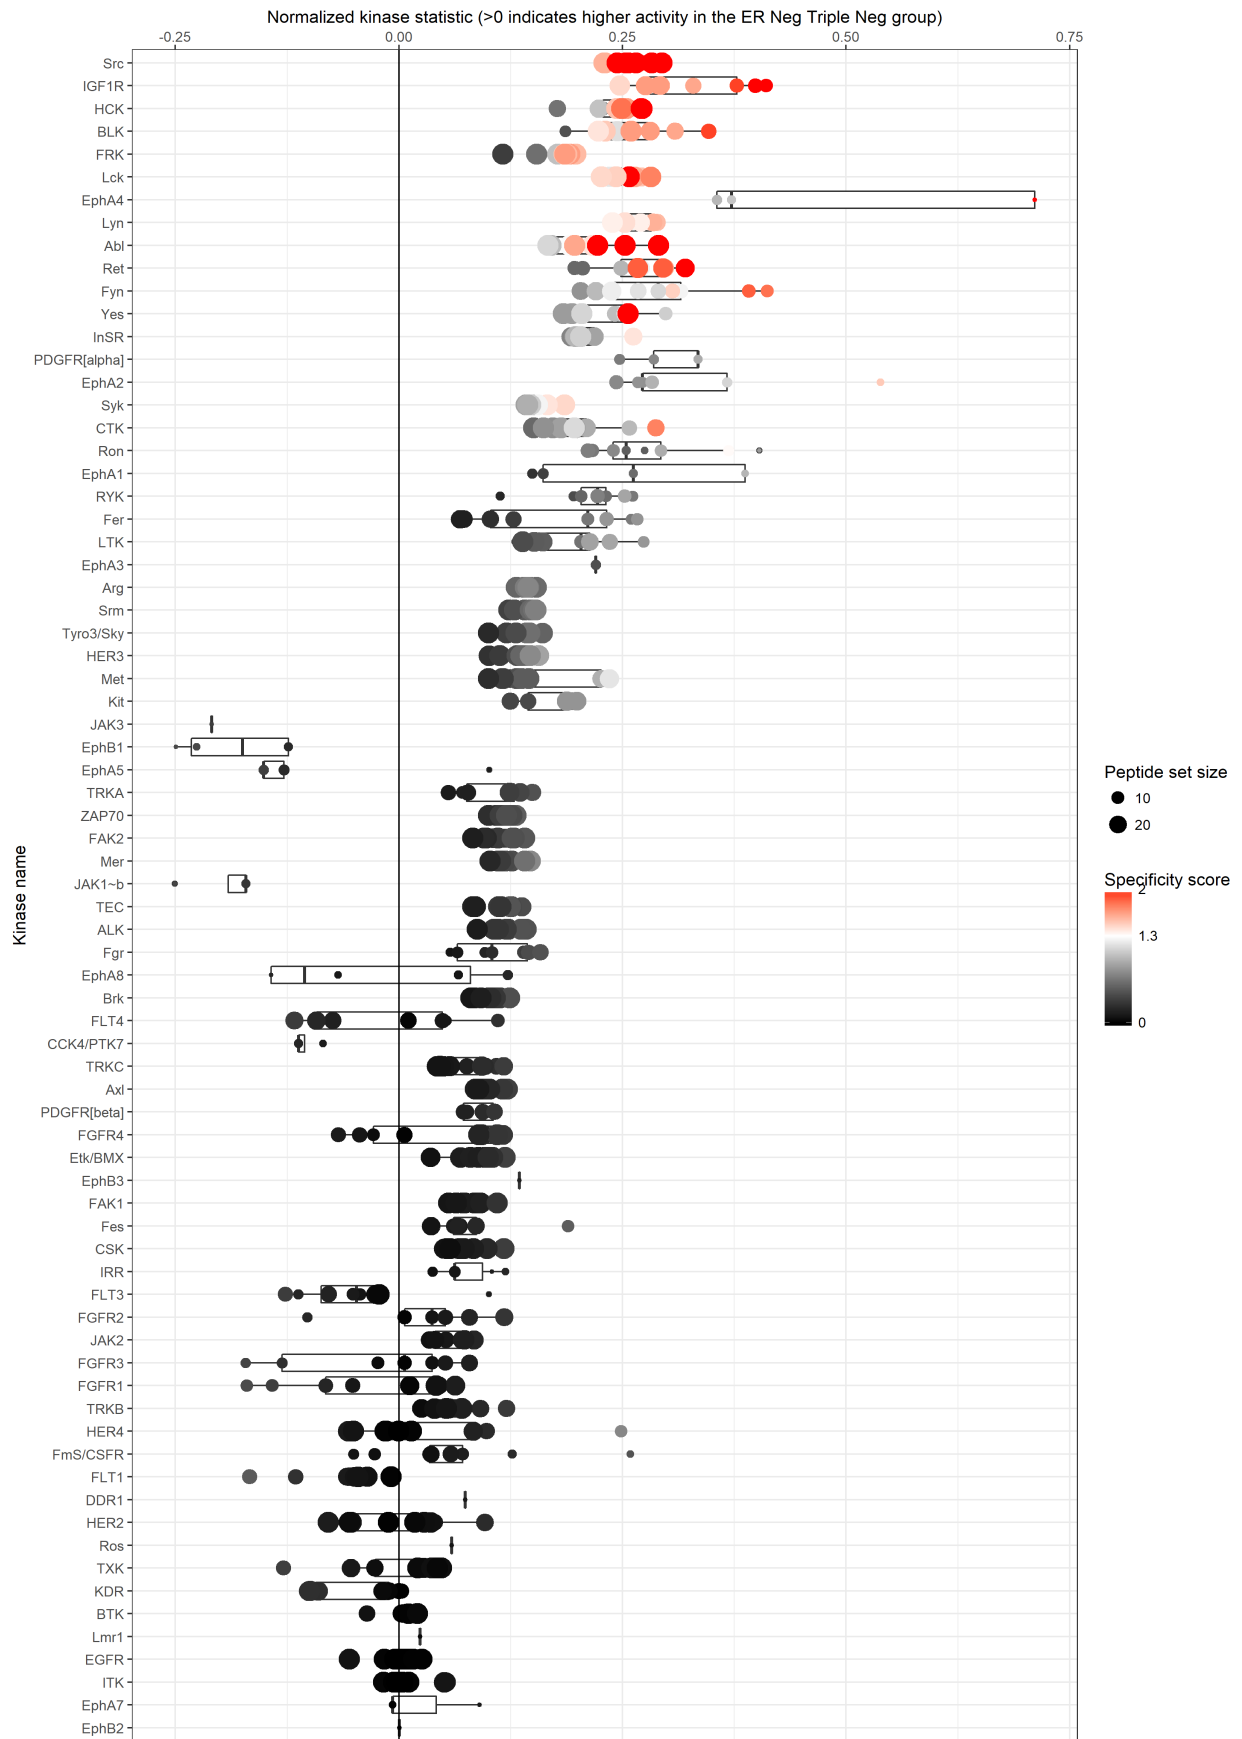

# HR-neg HER2 pos pts Vs HVs

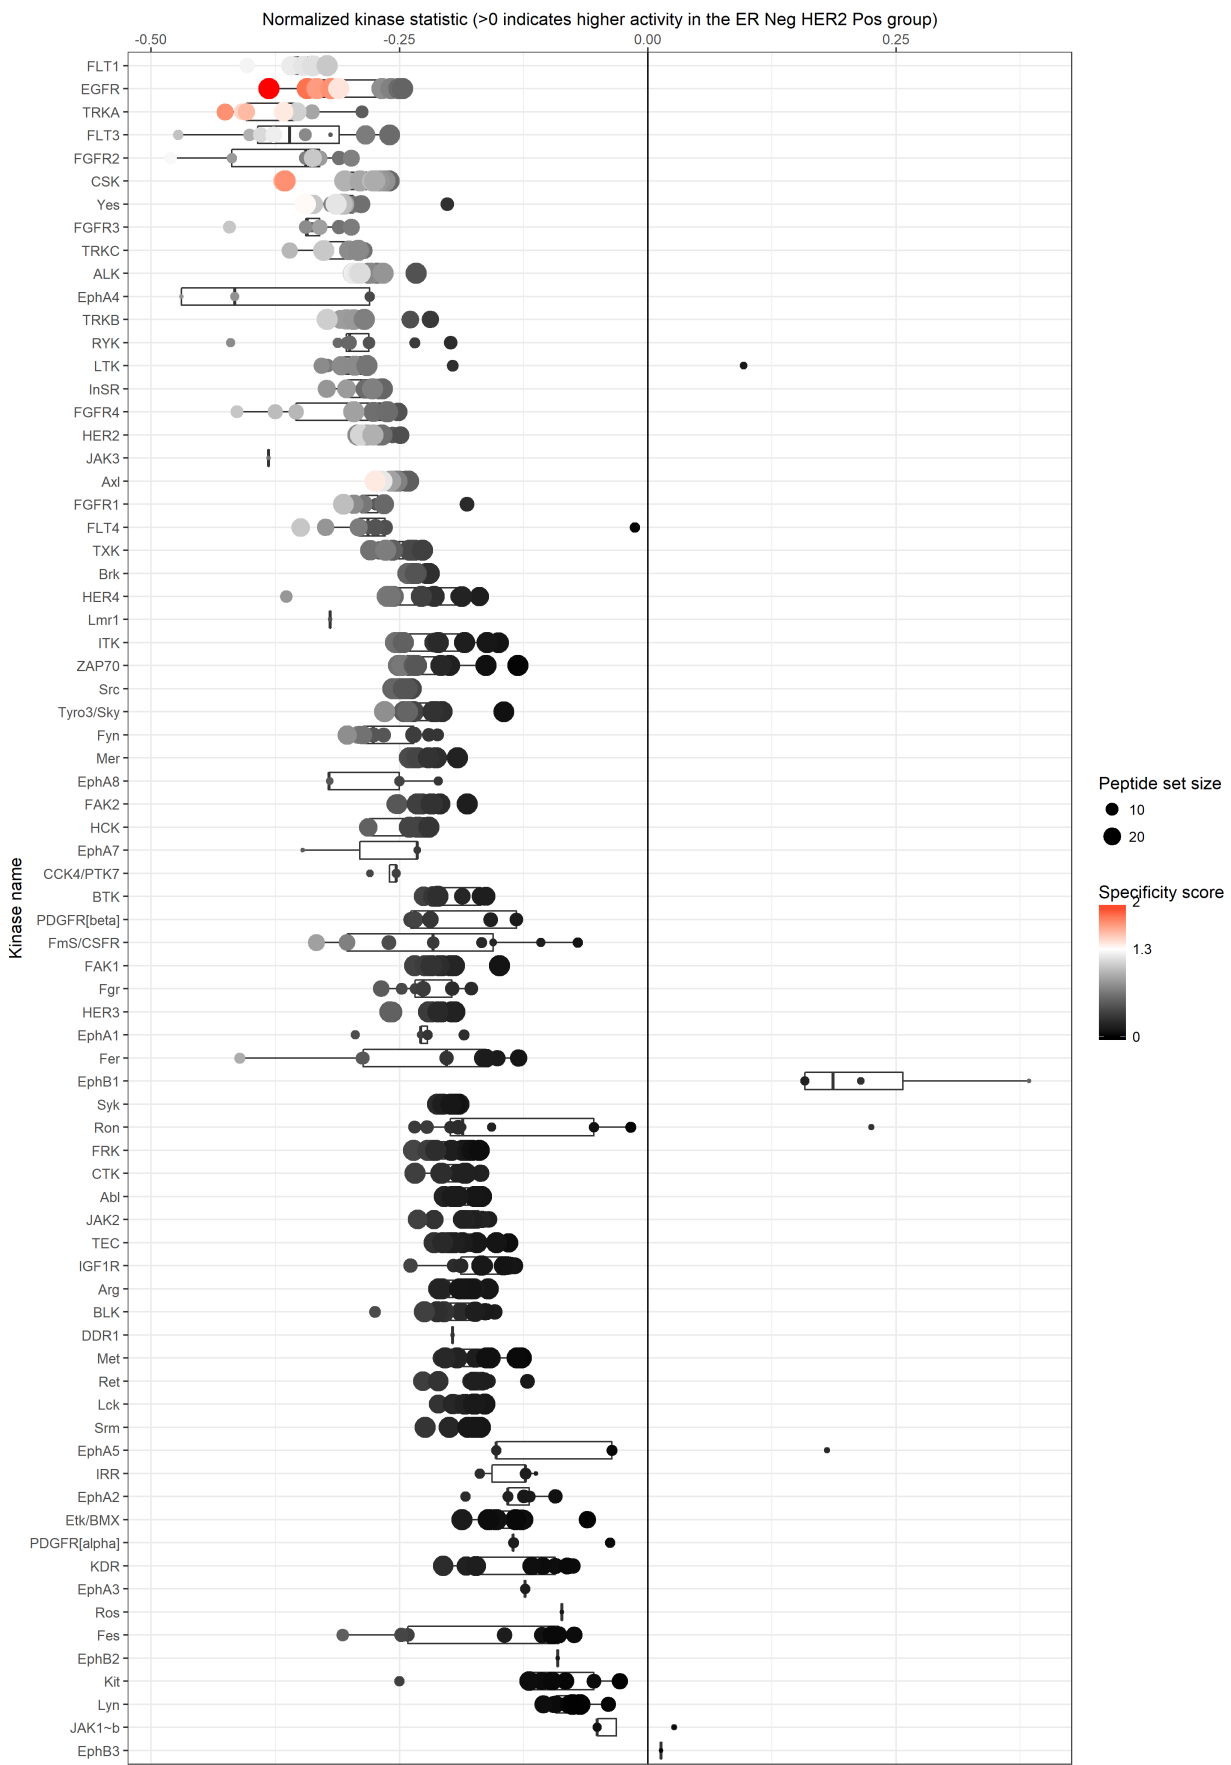



## Benign breast disease compared to HVs for STK family

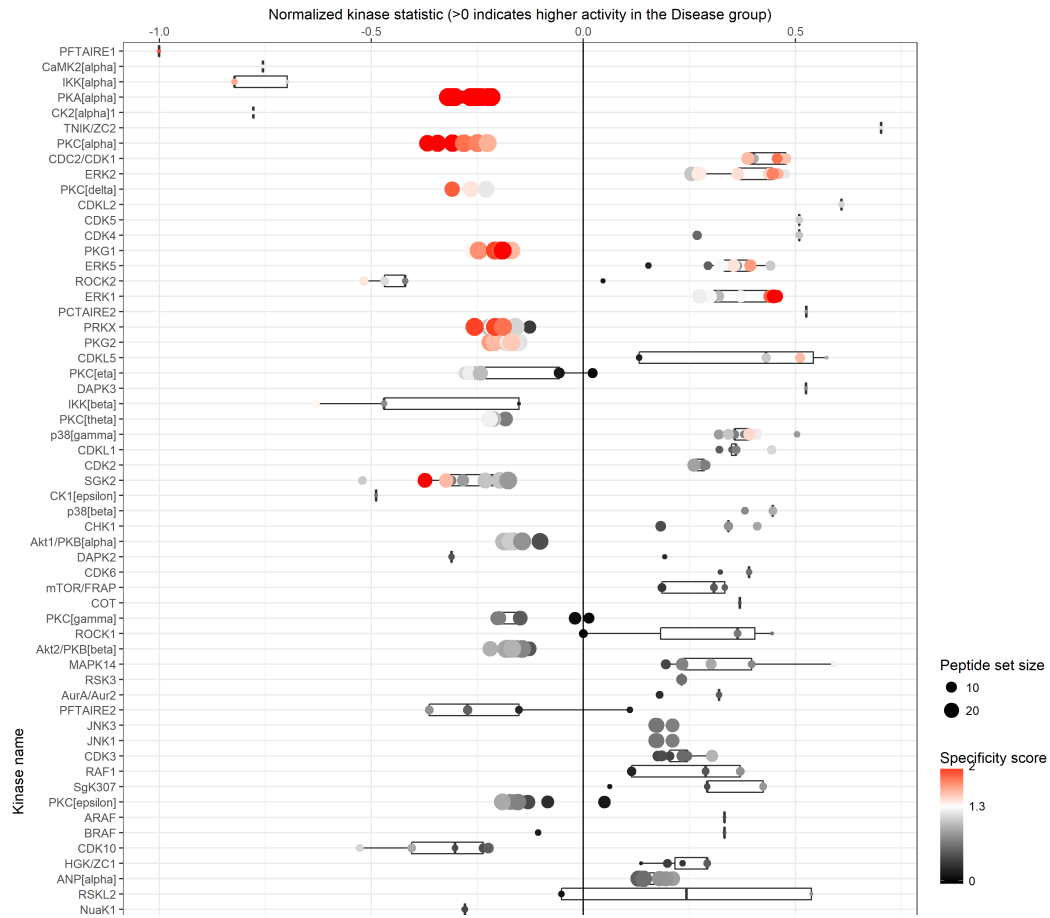

## Benign breast disease compared to HVs for PTK family

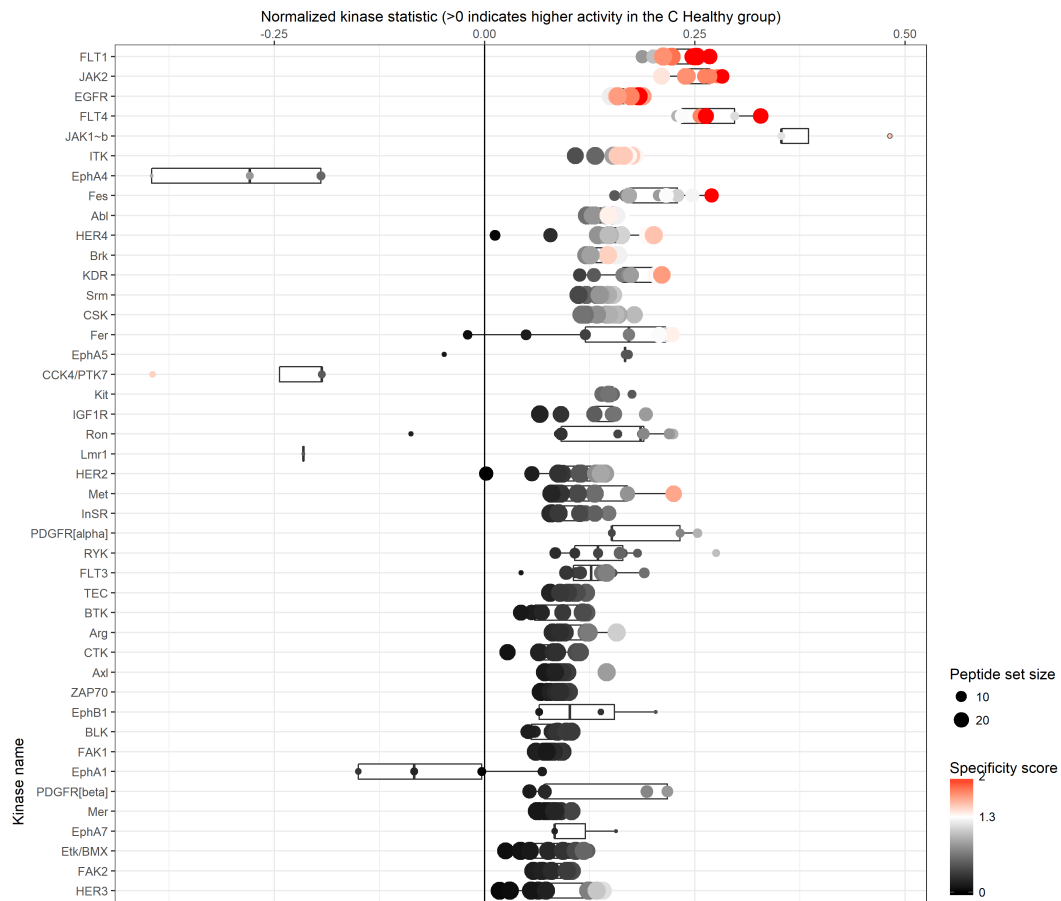

**Upstream Kinase Analysis showing a list of putative kinases for either the STK or PTK families based on the peptides phosphorylated differently in patients compared to HVs. The analysis is done for each subtype of breast cancer or patients with benign disease separately as indicated.** Size of circle represents peptide data set belonging to each kinase and colour scale represents the specificity of the kinase for that peptide set (red highly specific).
